# Supplementary material for: GDF15 Is an Eribulin Response Biomarker also Required for Survival of DTP Breast Cancer Cells
Source: MDPI journal article supplement (doi:10.3390/cancers14102562), 2022-05-23

## Supplemental Figures

**Figure S1.** Eribulin dose response curve in MDA-MB-231 and MCF7 cell lines (crystal violet staining quantification) and MCF10A cells (cell-counting). Representative images of MDA-MB-231, MCF7 and MCF10A cells following treatment with indicated dose of eribulin for 7 days. Images taken at 10x magnification.

**Figure S2.** Heat maps **(A)** and Volcano plots **(B)** representing the proteins that were significantly over-and/or down secreted in the second and third biological replicates.

**Figure S3.** PCA analysis **(A)** and heat maps of hierarchical clustering analysis **(B)** of the different MTA treatments in the second and third biological replicates.

**Figure S4. (A)** Representative images of 3D cell-cultured MDA-MB-231 and MCF7 cells following treatment with indicated dose of eribulin for 7 days. Images taken at 10x magnification. **(B)** Representative confocal images of Actin (red) immunofluorescence in 3D cell-cultured MDA-MB-231 and MCF7 cells following treatment with vehicle and 1.5nM eribulin for 7 days. Nuclei were stained with DAPI.

**Figure S5. (A)** WB analysis of GDF15 protein in siCTRL and siGDF15 cells in different breast cancer cell lines. Normalization was done with Actin as a loading control. **(B)** Representative image of crystal violet staining in siCTRL and siGDF15 BT549 cells treated for 7 days with vehicle and 1.5nM eribulin treatment. **(C)** Graphs of cell viability quantification using CellTiter staining in MDA-MB-231, MCF7 and BT549 cell lines treated for 7 days with vehicle, eribulin, eribulin + IgG and eribulin + anti-GDF15 Ab.

**Figure S6.** WB analysis of GDF15 protein in cell lysates and secretomes collected after 72 hours of treatment with different drugs: eribulin, metformin, doxorubicin, carboplatin and paclitaxel.

Figure S1

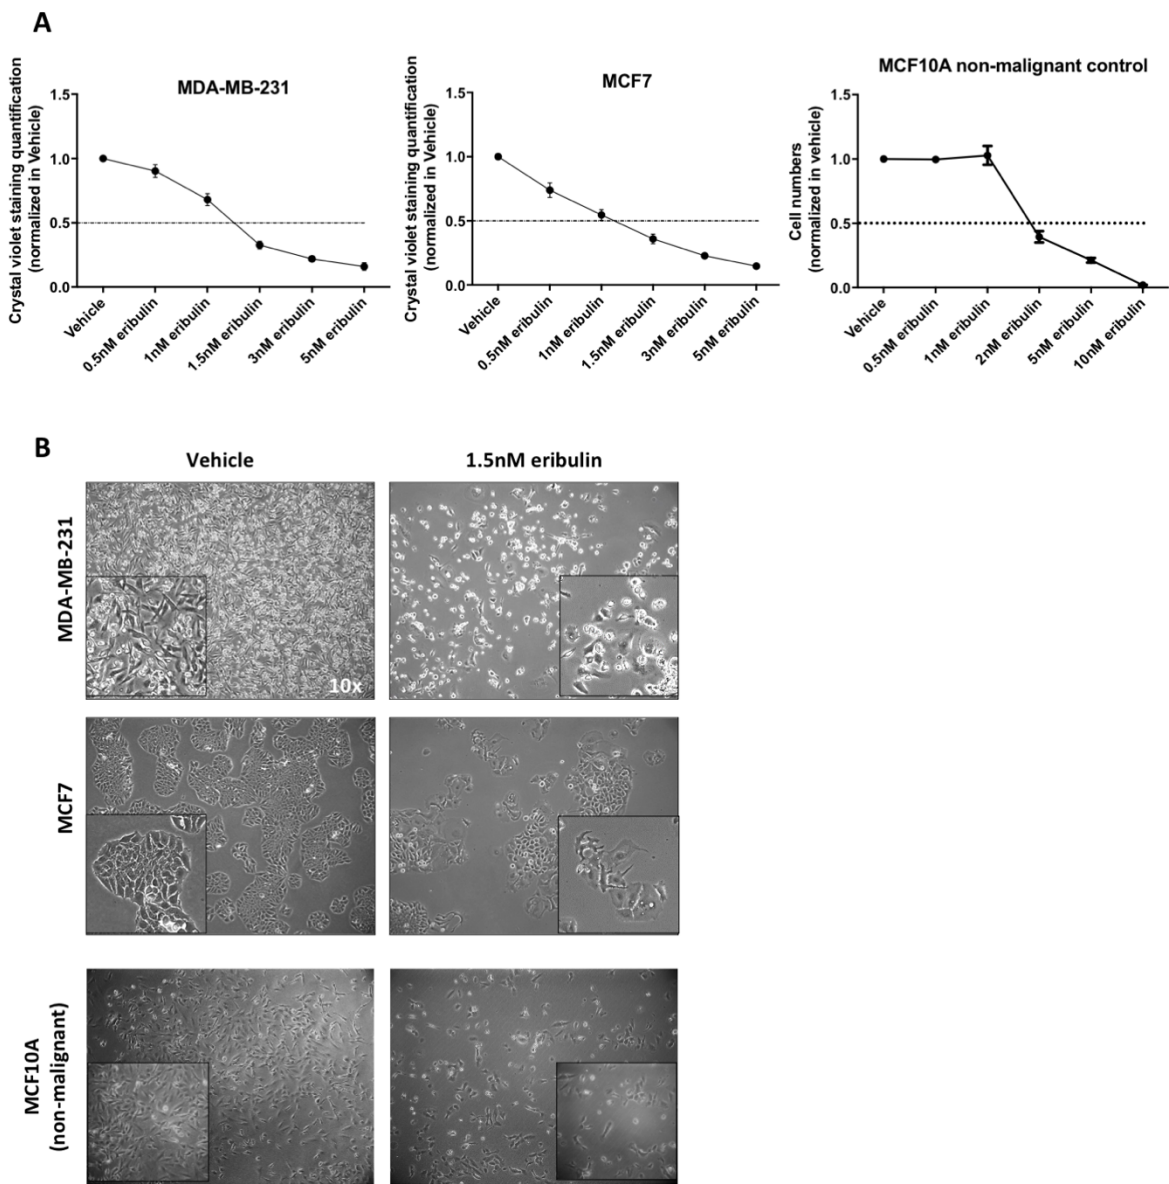

Figure S2

A

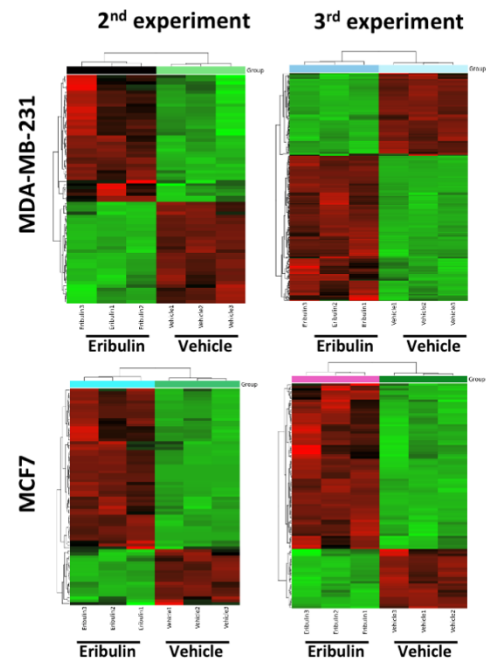

B

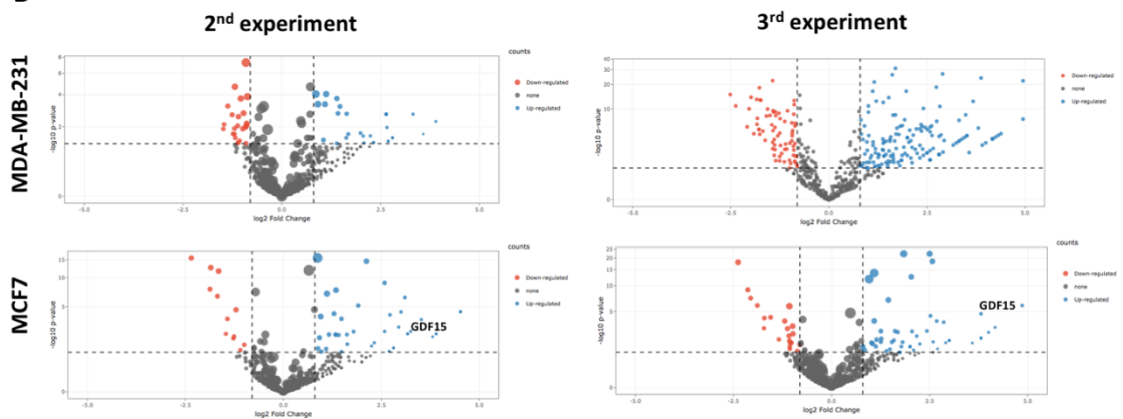

Figure S3

A

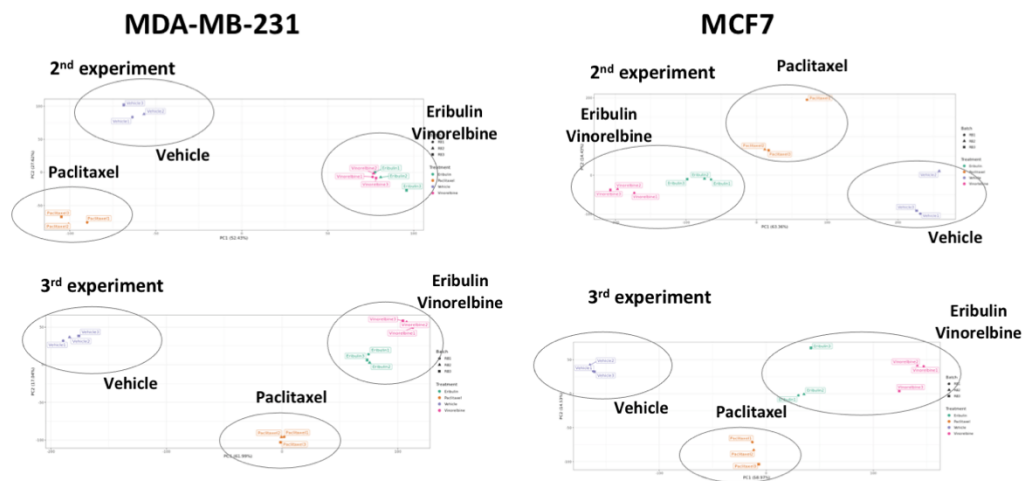

B

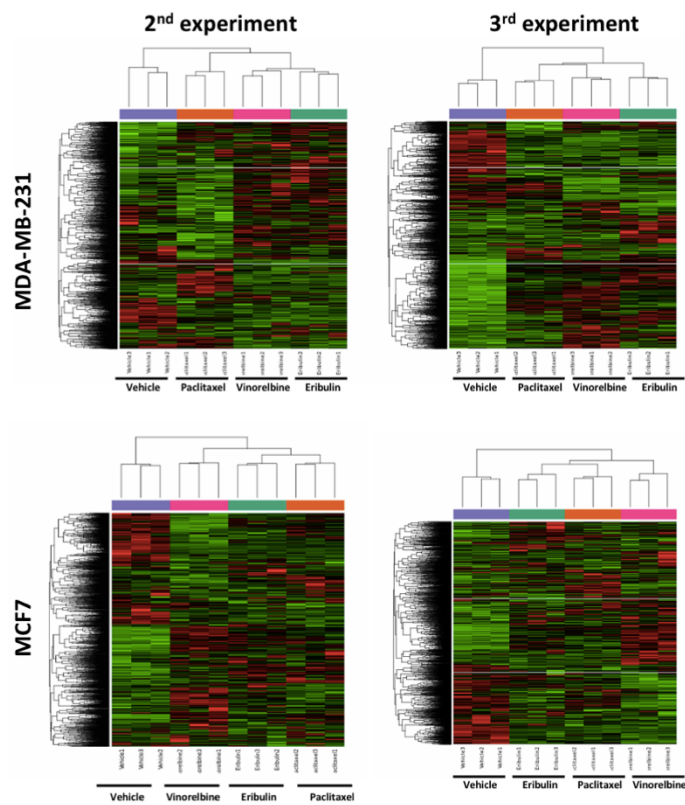



Figure S4

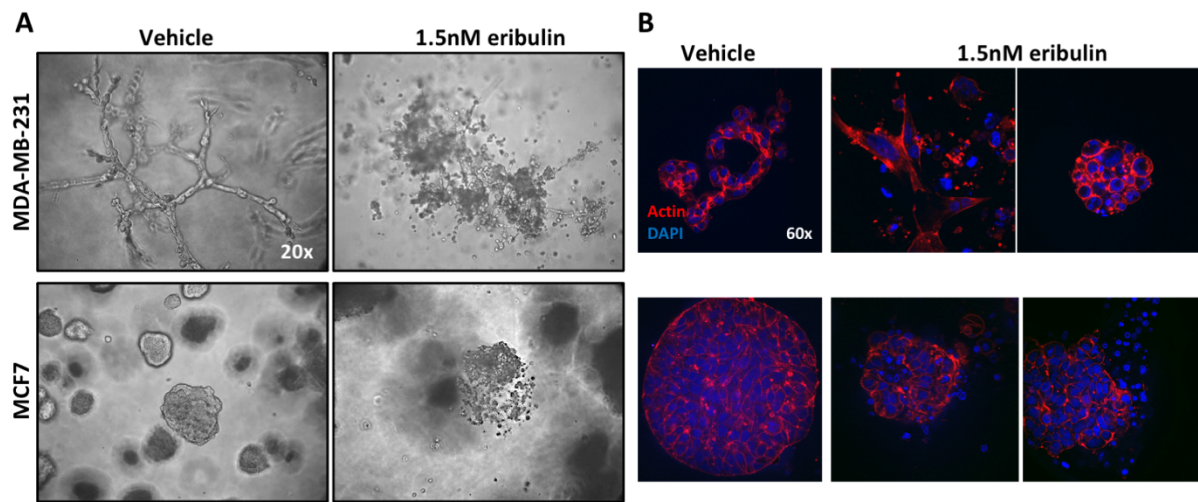

Figure S5

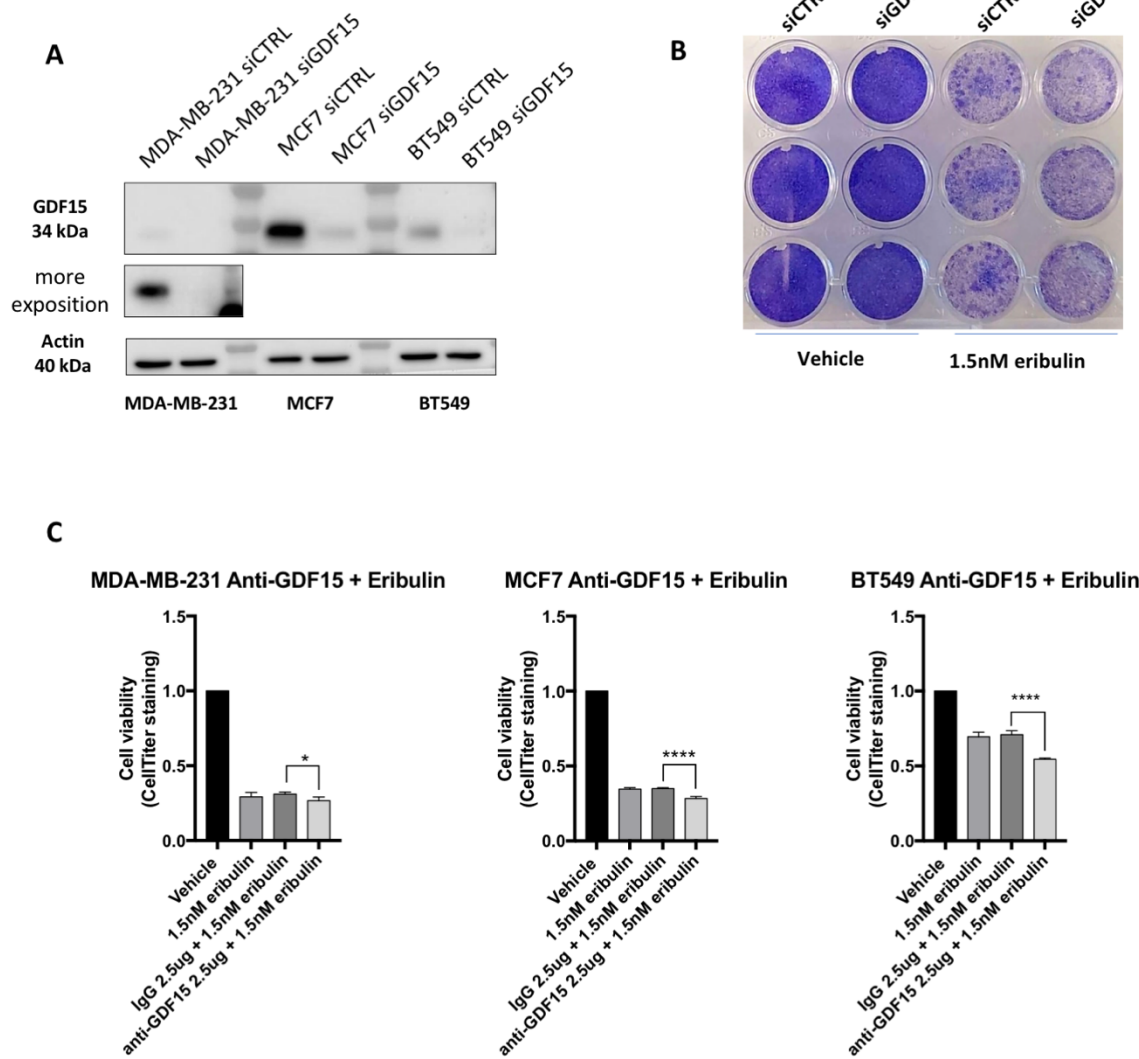

Figure S6

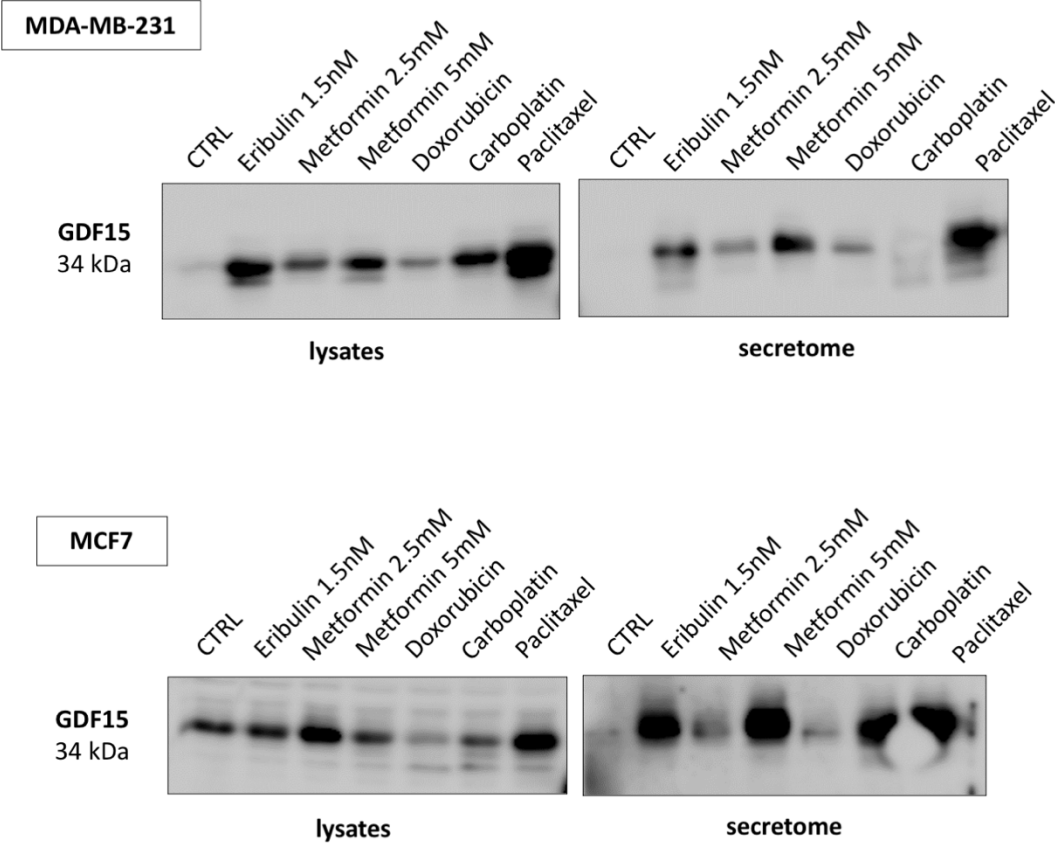

## Uncropped blots

Figure 1 E

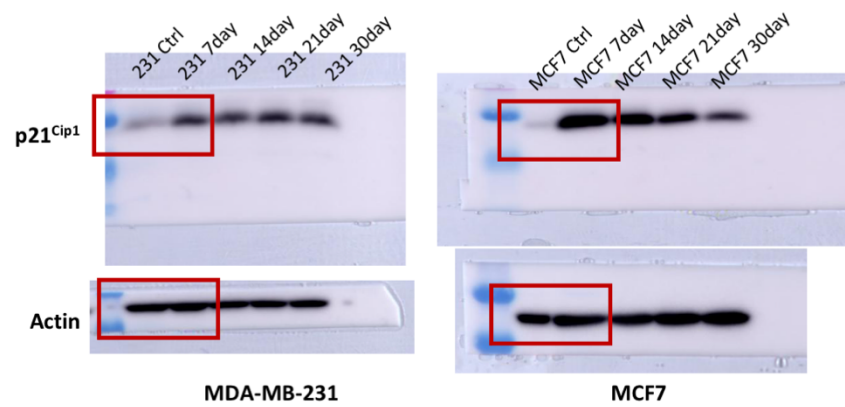

Figure 2 E – MDA-MB-231

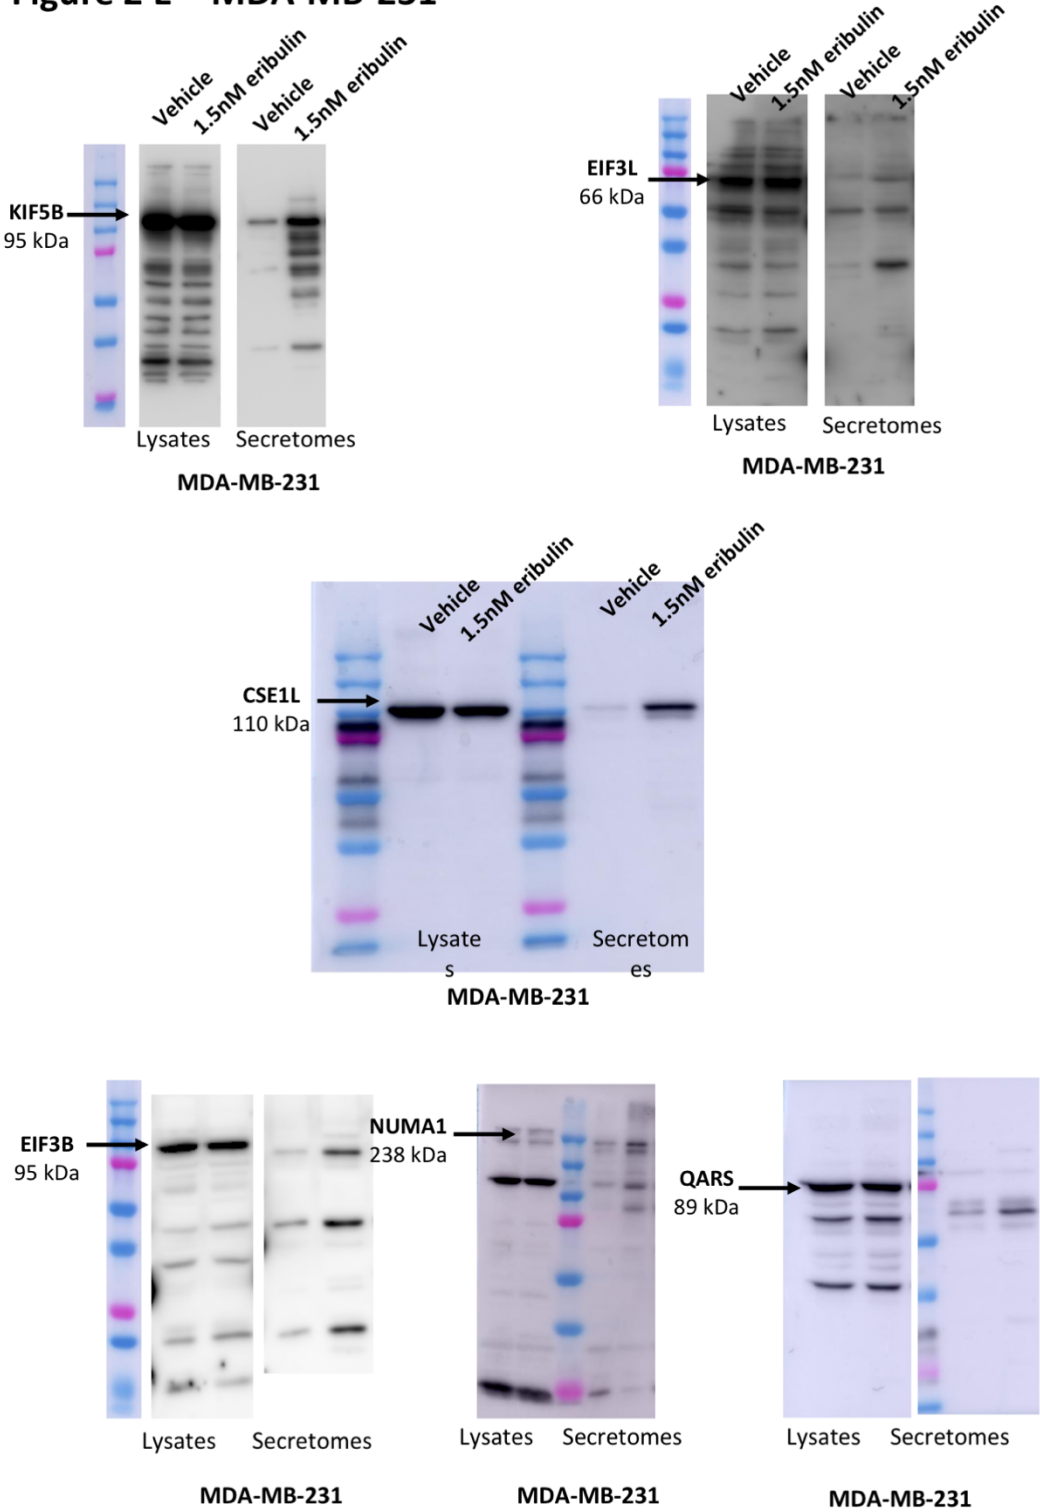

Figure 2 E – MDA-MB-231

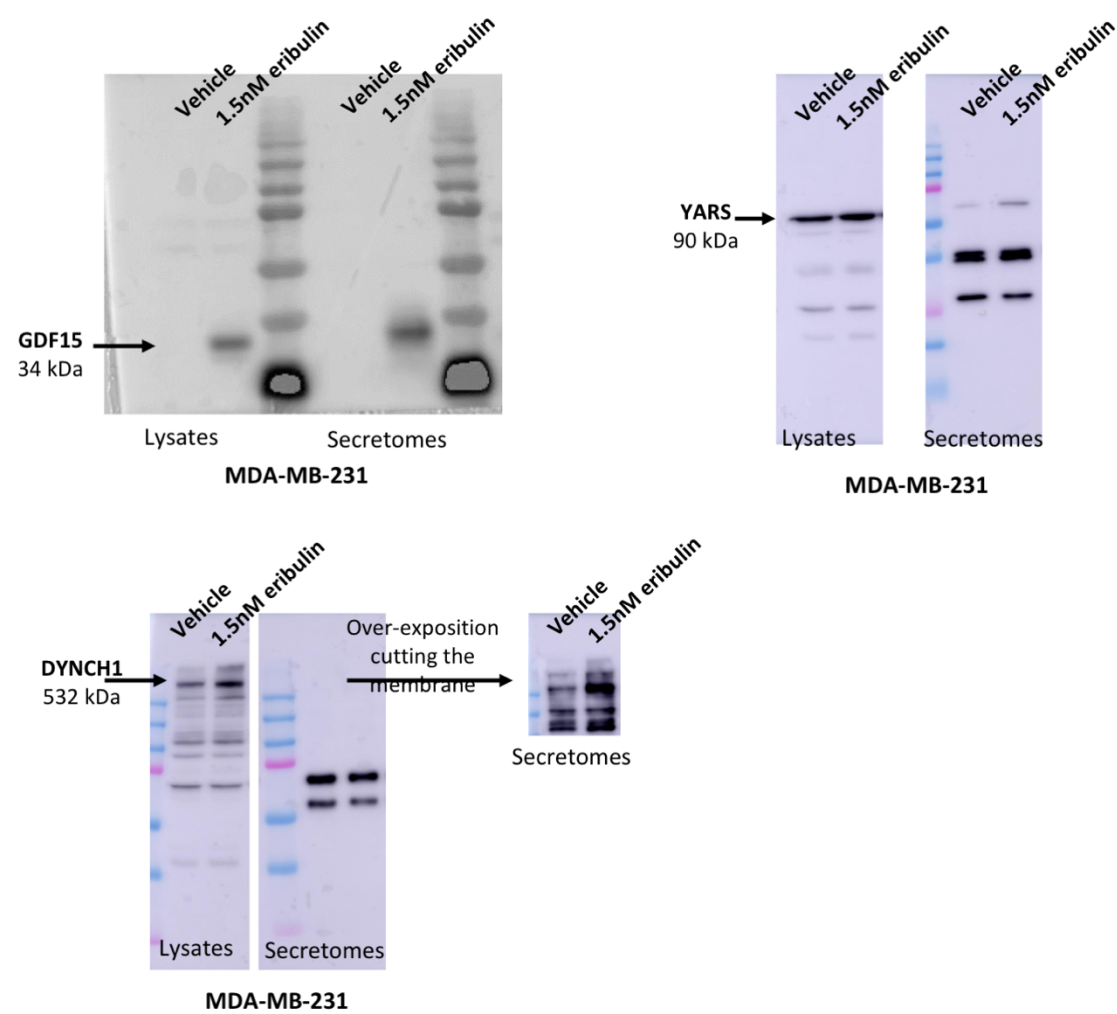

Figure 2 E – MCF7

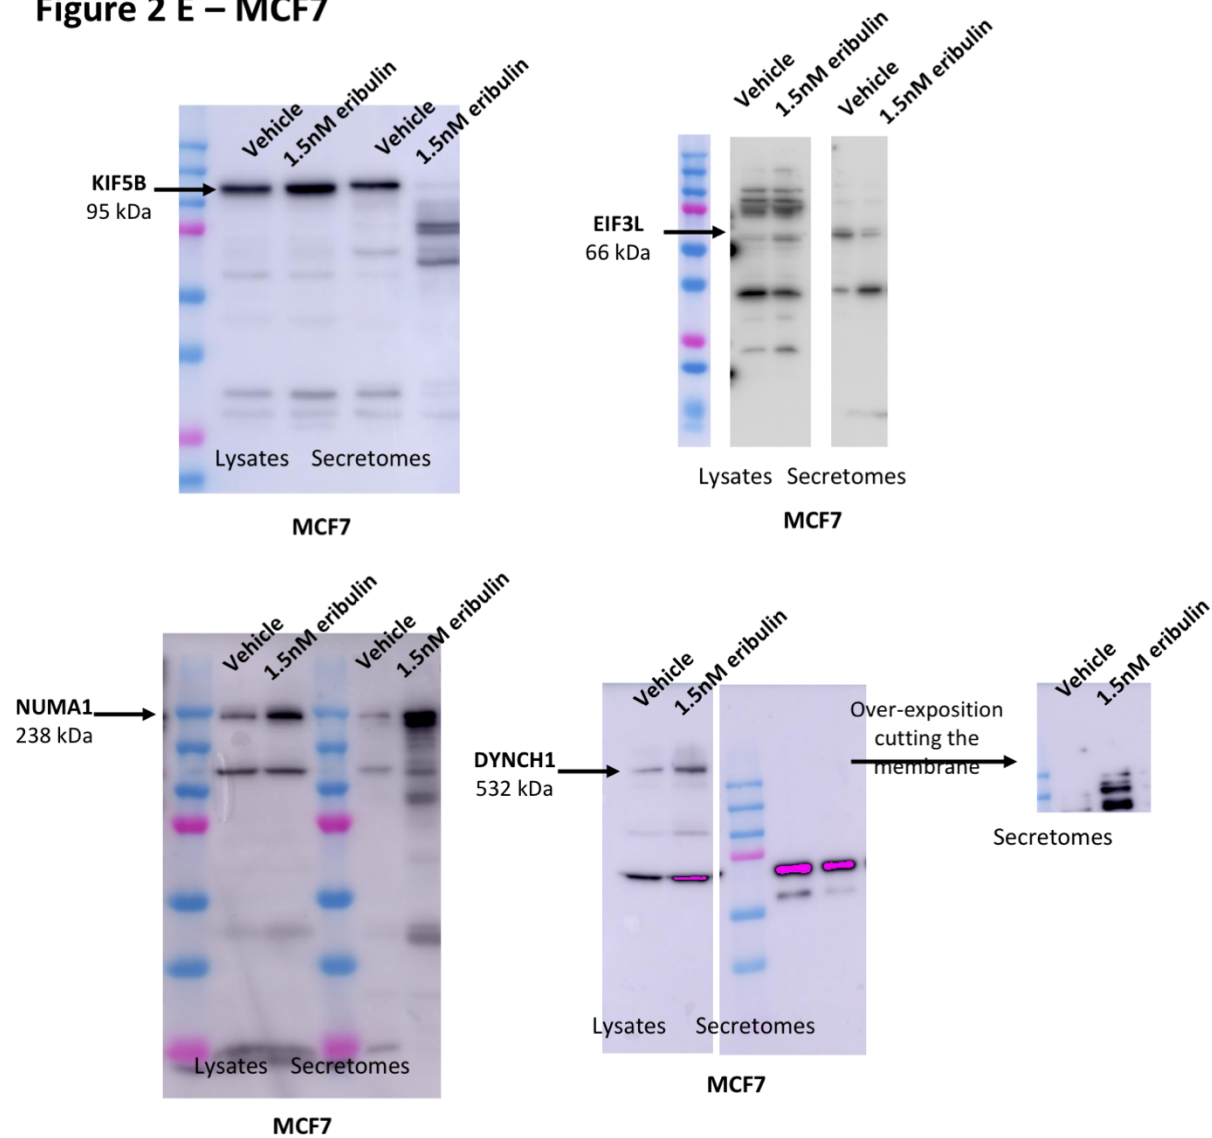

Figure 2 E – MCF7

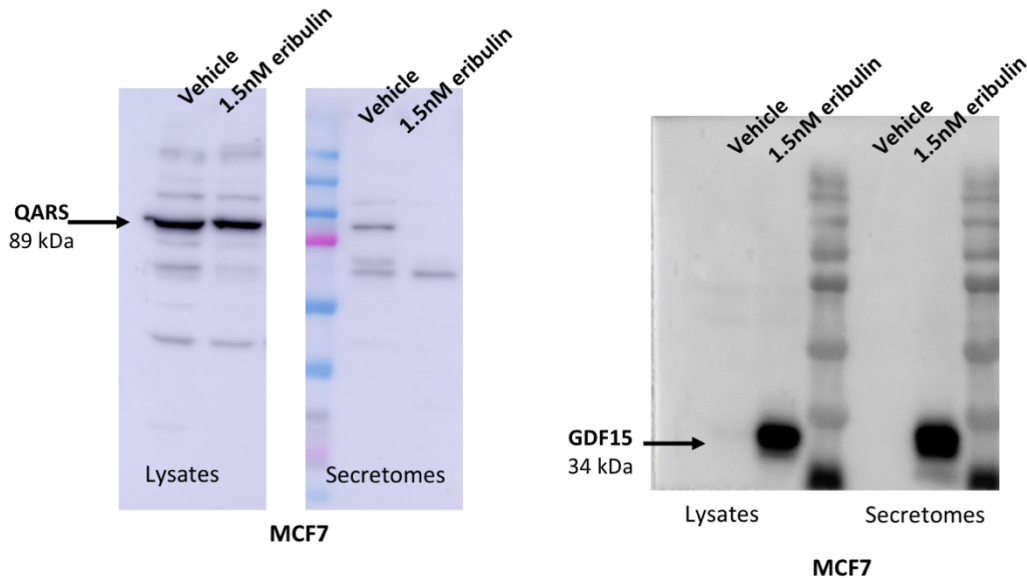



Figure 4 A

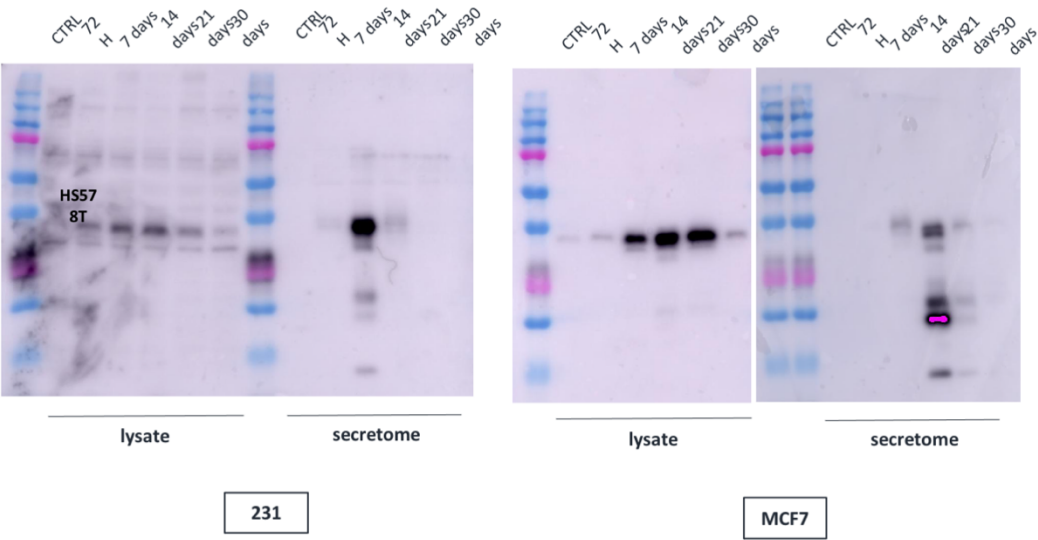

Figure 4 B

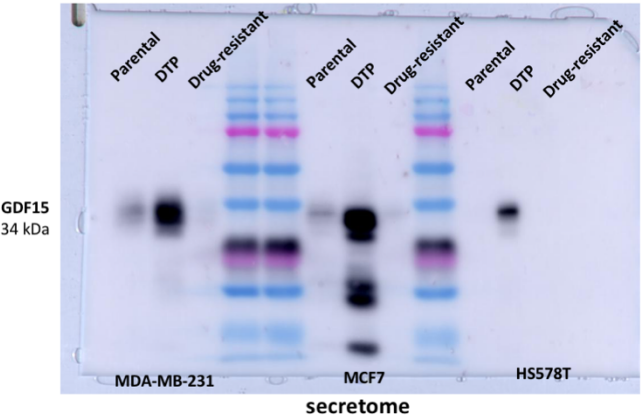

Figure 4 C

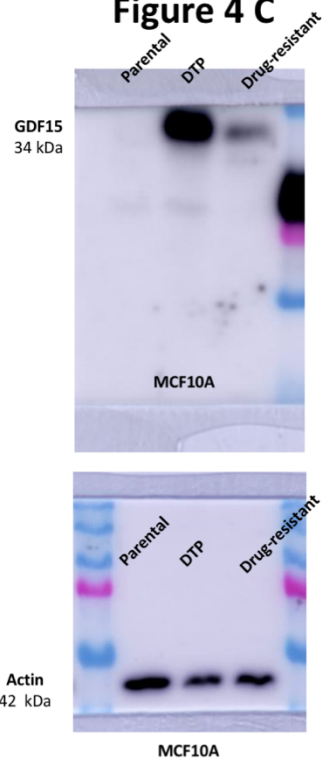

Figure 4 E

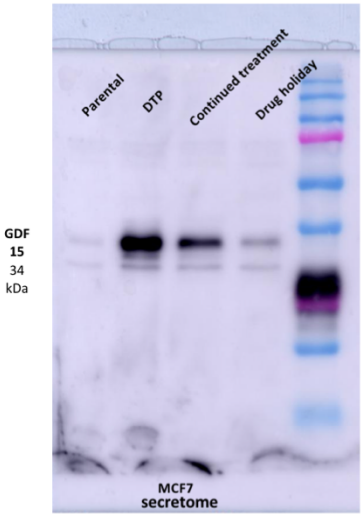

Figure 4 G

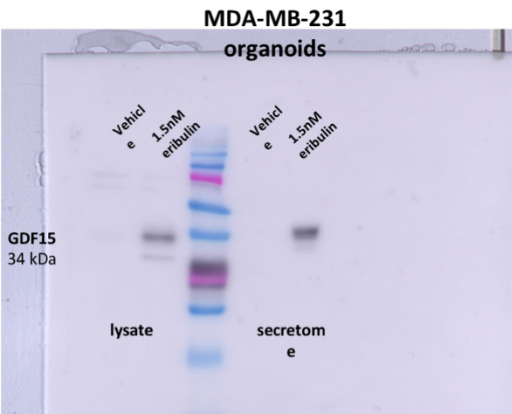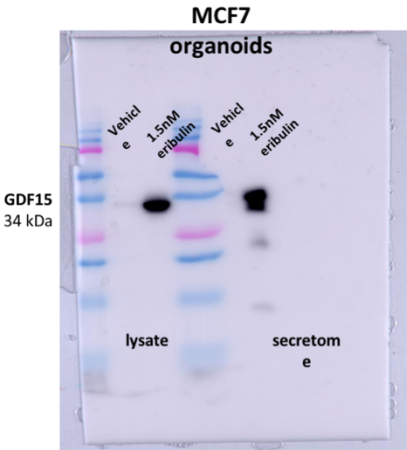

Figure 5 B

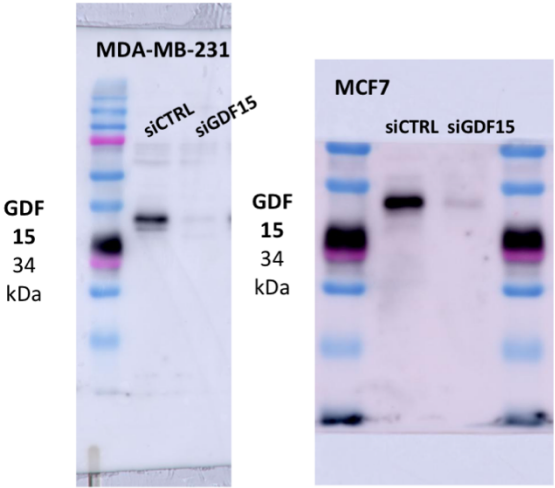

Figure 5 F

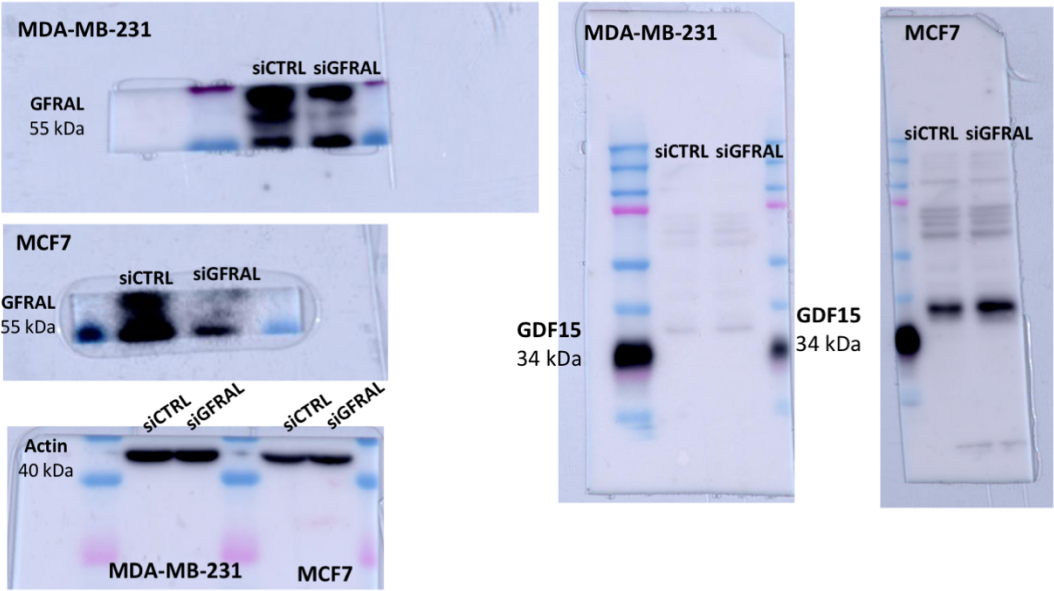

Figure S5 A

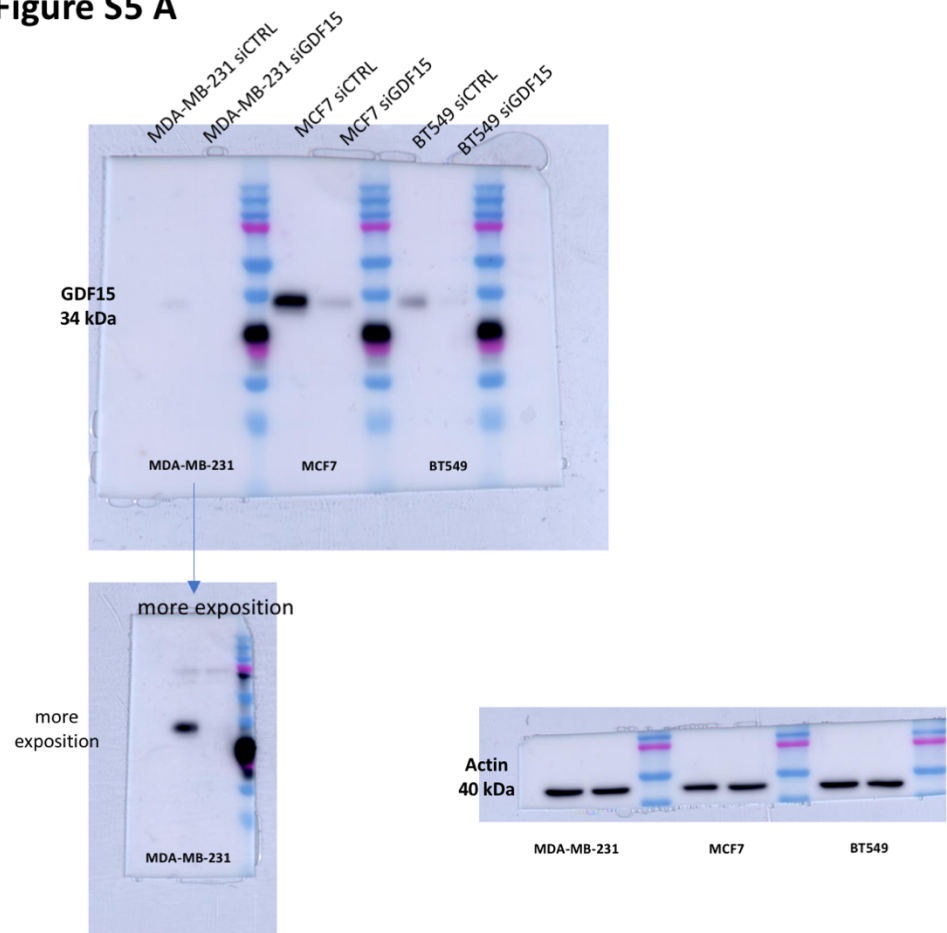

Figure S6

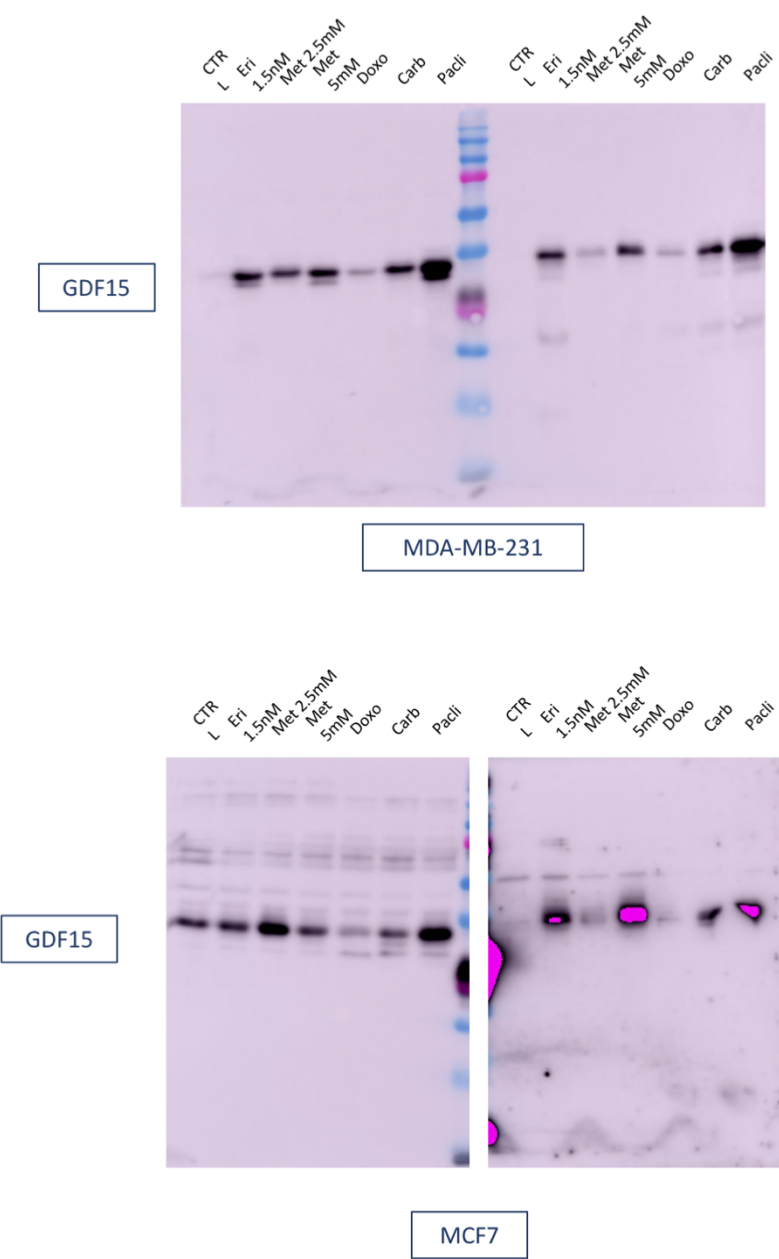

Supplement: s1 [file s1]
